1 ***In situ* transcriptional profile of a germinal center plasmablastic burst hints at**  
2 ***MYD88/CD79B* mutants-enriched Diffuse Large B-cell Lymphomas.**

3

4 Vincenzo L'Imperio<sup>1\*</sup>, Gaia Morello<sup>2\*</sup>, Maria Carmela Vegliante<sup>3</sup>, Valeria Cancila<sup>2</sup>, Giorgio  
5 Bertolazzi<sup>2</sup>, Saveria Mazzara<sup>4</sup>, Beatrice Belmonte<sup>2</sup>, Piera Balzarini<sup>5</sup>, Lilia Corral<sup>6</sup>, Arianna Di  
6 Napoli<sup>7</sup>, Fabio Facchetti<sup>8</sup>, Fabio Pagni<sup>1\*</sup>, Claudio Tripodo<sup>2,9\*</sup>

7 <sup>1</sup> Department of Medicine and Surgery, University of Milano-Bicocca, Pathology, San Gerardo  
8 Hospital, Via G.B. Pergolesi 33, Monza, Italy.

9 <sup>2</sup> Tumor Immunology Unit, Department of Sciences for Health Promotion and Mother-Child  
10 Care "G. D'Alessandro", University of Palermo, Palermo, Italy.

11 <sup>3</sup> Hematology and Cell Therapy Unit, IRCCS-Istituto Tumori 'Giovanni Paolo II', Bari, Italy

12 <sup>4</sup> Division of Diagnostic Haematopathology, European Institute of Oncology, Milan, Italy.

13 <sup>5</sup> Department of Molecular and Translational Medicine, University of Brescia, Piazzale Spedali  
14 Civili 1, 25123, Brescia, Italy.

15 <sup>6</sup> Centro Ricerca Tettamanti, Pediatric Clinic, University of Milan Bicocca, San Gerardo  
16 Hospital/Fondazione MBBM, Monza, Italy.

17 <sup>7</sup> Pathology Unit, Sapienza University of Rome, Sant'Andrea Hospital, Rome, Italy.

18 <sup>8</sup> Pathology Unit, University of Brescia, Brescia, Italy.

19 <sup>9</sup> Tumor and Microenvironment Histopathology Unit, IFOM, the FIRC Institute of Molecular  
20 Oncology, Milan, Italy.

21 \* These Authors equally contributed

22

23 Correspondence:

24 Prof. Claudio Tripodo, Tumor Immunology Unit, University of Palermo, Corso Tukory  
25 211, 90134, Palermo. Phone +3909123896211. Email: [claudio.tripodo@unipa.it](mailto:claudio.tripodo@unipa.it)

26

27

28

29

30

31

32 **Abstract**

33 The germinal center (GC) reaction results in the selection of B-cells acquiring effector Ig  
34 secreting ability by progressing towards plasmablastic differentiation. This transition is  
35 associated with exclusion from the GC microenvironment. The aberrant expansion of  
36 plasmablastic elements within the GC fringes configures an atypical condition, the biological  
37 characteristics of which have not been defined yet. We investigated the *in situ*  
38 immunophenotypical and transcriptional characteristics of a non-clonal germinotropic  
39 expansion of plasmablastic elements (GEx) occurring in the tonsil of a young patient.  
40 Compared to neighboring GC and peri-follicular regions, the GEx showed a distinctive  
41 signature featuring key regulators of plasmacytic differentiation, cytokine signaling, and cell  
42 metabolism. The GEx signature was tested in the setting of diffuse large B-cell lymphoma  
43 (DLBCL) as a prototypical model of lymphomagenesis encompassing transformation at  
44 different stages of GC and post-GC functional differentiation. The signature outlined DLBCL  
45 clusters with different immune microenvironment composition and enrichment in genetic  
46 subtypes.

47

48 **Significance:** This report represents the first insight into the transcriptional features of a  
49 germinotropic plasmablastic burst, shedding light into the molecular hallmarks of B cells  
50 undergoing plasmablastic differentiation and aberrant expansion within the non-canonical  
51 setting of the GC microenvironment.

52

53 **Running title:** Spatial profiling of a germinotropic plasmablastic expansion

54

55 **Keywords:** digital spatial profiling, germinal center, plasmablast, diffuse large B-cell  
56 lymphoma.

## 57 **Introduction**

58 Within secondary lymphoid organs immune cells display topographic compartmentalization  
59 underlying functional commitment towards different stages of immune response induction and  
60 regulation. In lymphoid follicles, germinal centers (GCs) represent a complex specialized  
61 microenvironment sustaining B-cell proliferative bursts underlying somatic hypermutation and  
62 class-switch recombination of immunoglobulin (Ig) genes, communication with T cell subsets  
63 with helping function (Tfh), and interplay with specialized mesenchymal scaffolds (i.e. FDCs)  
64 (1). These events play through the dynamical iteration of elements between the dark (DZ),  
65 intermediate and light (LZ) zones of the GC (2), eventually resulting in the differentiation and  
66 displacement from the GC of cells acquiring effector capabilities through the synthesis and  
67 secretion of Igs (i.e. plasmablasts and plasma cells) (3). Alterations in the topographic  
68 compartmentalization of GC and extra-GC populations in lymphoid tissues are commonly  
69 observed in the setting of lymphoproliferative diseases, where the accumulation of cells with  
70 morphological or immunophenotypical features conflicting with their topographic localization  
71 represents a hallmark of histopathological analyses. This assumption reached its highest  
72 expression with the introduction of a diffuse large B cell lymphoma (DLBCL) prognostic sub-  
73 classification based on the presumed cell-of-origin (COO), as determined by gene expression  
74 profiling (GEP) (4-6).

75 We have investigated here an atypical germinotropic expansion of non-clonal, light-chain  
76 restricted B cells with plasmablastic features confined to a single enlarged GC structure in the  
77 tonsil of a young patient, through in situ immunolocalization analyses and high throughput  
78 digital spatial profiling. Comparing the features of the atypical germinotropic expansion (GEx)  
79 with those of topographically preserved DZ, LZ and peri-follicular (PERI) regions of interest  
80 (ROIs) we identified a unique transcriptomic profile of the GEx ROIs featuring the

81 overexpression of transcripts involved in plasmacytoid differentiation, cytokine signaling, and  
82 cell metabolism.

83 To probe the reflection of the identified transcriptional signature in a setting of B-cell  
84 lymphomatous transformation embracing the full spectrum of GC- and post-GC differentiation,  
85 the discriminative 20 genes were used to cluster a large cohort of diffuse large B-cell lymphoma  
86 (DLBCL) transcriptomic data. The GEx signature highlighted two clusters with different  
87 overall survival in DLBCL, where cases with the highest expression of GEx hallmark genes  
88 were characterized by poorer prognosis.

89

90

## 91 **Materials and methods**

### 92 *Clinical setting*

93 This study started from the incidental finding of the reactive germinotropic plasmablastic  
94 expansion described in the Results section, in the tonsil of a young patient who underwent  
95 tonsillectomy for clinical hypertrophy. Sample was obtained and handled according to the  
96 Declaration of Helsinki. Informed consent for surgery and histopathological studies was  
97 obtained from the legal representatives. The case was included in the study 05/2018 approved  
98 by the University of Palermo Institutional Review Board.

### 99 *Histological, immunohistochemical and molecular analyses*

100 Tonsillar tissue has been formalin-fixed and paraffin-embedded (FFPE) and 3  $\mu$ m thick  
101 sections have been stained with hematoxylin and eosin (H&E). IHC has been performed at the  
102 Pathology Department of ASST Monza, San Gerardo Hospital, Monza, Italy using a Dako  
103 Omnis platform (Dako, Denmark) using antibodies directed against CD20 (L26), CD3  
104 (Polyclonal), Bcl2 (124), Bcl6 (PG-B6p), CD21, ki-67 (Mib-1), IRF4 (MUM1), CD10, CD30  
105 (Ber-H2), CD138 (Mi15), HHV8 (13B10), kappa and lambda light chains. Double



106 immunohistochemistry has been performed for MUM1 and CD10 using 3-3'-diaminobenzidine  
107 (DAB) and 3-amino-9-ethylcarbazole (AEC) as chromogens, respectively. In situ fluorescence  
108 hybridization (FISH) study has been performed using a *IRF4/DUSP22* (6p25) Break Apart kit  
109 (Kreatech, Leica Biosystem, Germany) at the Pathology Department of Spedali Riuniti di  
110 Brescia. Quantitative evaluation of immunophenotypical markers was performed by applying  
111 the HALO image analysis software (v3.2.1851.229, Indica Labs) to regions selected on whole  
112 slide digital scans acquired using an Aperio CS2 slide scanner with the ImageScope software  
113 (v12.3.28013, Leica Biosystems, Germany).

114 Quantitative polymerase chain reaction (Q-PCR) to detect clonal immunoglobulin genes  
115 rearrangement was performed after laser microdissection on H&E-stained slides, using an  
116 LMD6 platform (Leica Microsystems, Germany).

#### 117 *Digital spatial profiling*

118 The transcriptional landscape of 15 different spatially-resolved regions of interests (ROIs) of  
119 the tonsil (5 peri/inter-follicular ROIs, 5 DZ and 5 LZ ROIs from morphologically normal  
120 follicles) and 9 ROIs from the GEx was determined by Digital Spatial Profiling on slides  
121 stained with CD271/NGFR (as an FDC marker to highlight the LZ) and CD20 (as a B-cell  
122 marker). The 24 selected and segmented ROIs were profiled using a GeoMx Digital Spatial  
123 Profiler (DSP) (NanoString, Seattle WA) as previously described (7), applying the Cancer  
124 Transcriptome Atlas panel (<https://www.nanostring.com/products/geomx-digital-spatial-profiler/geomx-rna-assays/geomx-cancer-transcriptome-atlas/>) (Supplementary Table 1).

#### 126 *Bioinformatic Data Analysis*

127 After quality check step, raw counts were normalized against the 75th percentile of signal from  
128 their own ROI and normalized data were used to perform PCA using FactoMine R package.  
129 For hierarchical clustering analysis of the ROIs the Euclidean distance metric across samples

130 was considered and complete aggregation method was used for building tree within the R  
131 package hclust.

132 Differential expression analyses were carried out by applying the moderated t-test using the  
133 limma package (8); pairwise comparisons between GEx and DZ/LZ/Peri ROIs were  
134 considered. Upregulated/downregulated genes were selected for subsequent analysis if their  
135 expression values were found to exceed the threshold of 0.05 FWER (Bonferroni correction).

136 The spatial GEx signature was assessed in the following Schmitz et al. dataset (6) and the  
137 clinical information was downloaded from the Schmitz et al. supplementary material.

138 After centering and scaling expression value, unsupervised hierarchical clustering analysis  
139 based on the GEx signature was performed to identify potential discriminative clusters based on  
140 Ward.D2 method on the Euclidean distance. Survival analysis was performed using log-rank  
141 test implemented in “survival” R package. Differences in patient characteristics among groups  
142 were analyzed with the Fisher’s exact test.

143 CIBERSORTx (<http://cibersortx.stanford.edu>) (9) has been used to calculate proportions of  
144 microenvironment cell included in the LM22 signature on Schmitz *et al.* (6) RNA-seq data of  
145 bulk tissues. This dataset was downloaded and analyzed using the authors’ normalization  
146 setting which included fragments per kilobase of transcript per million (FPKM) space. Bulk-  
147 mode batch correction (B-mode) was applied to mixture samples before imputing cell fractions  
148 and 1000 permutations were set for significance. Moreover, the SpatialDecon algorithm (10)  
149 was additionally used for Nanostring data (safeTME profile matrix was applied). The  
150 differences in CIBERSORTx cell fractions among clusters were investigated using the  
151 Wilcoxon-Mann-Whitney test. Similarly, the differences in SpatialDecon cell fractions among  
152 ROI subgroups were investigated using the Kruskal-Wallis test.

153 All statistical analyses have been performed using R statistical software (v4.0.2, [http://www.R-](http://www.R-project.org)  
154 [project.org](http://www.R-project.org)).

155 *Data Availability*

156 Normalized gene expression data generated in the Digital Spatial Profiling experiment are  
157 available in Supplementary Table 1

158

159 **Results**

160 *Pathology of the tonsil*

161 Histopathological analysis of the left tonsil from a young patient with clinical bilateral  
162 hypertrophy revealed, in a background of lymphoid follicles with hyperplastic features and  
163 preserved GC DZ, LZ and mantles, an isolated abnormal follicle with flattened mantle zone,  
164 an enlarged GC without evident DZ/LZ polarization, preservation of rare tingible body  
165 macrophages, and populated by a predominance of monomorphic plasmacytoid cells with  
166 immature morphology (Figure 1A, inset). Quantitative immunophenotypical characterization  
167 of reactive follicular (DZ and LZ) and peri-follicular (Peri) regions and of the atypical  
168 germinotropic plasmablastic expansion (GEx), highlighted conspicuous differences in the  
169 immune profile (Figure 1B-C). The reactive preserved GC DZ and LZ regions were  
170 characterized by B cells with strong CD20 expression, dense Ki-67 immunoreactivity (higher  
171 in the DZ), negativity for IRF4, except for scattered cells in a background of CD10-expressing  
172 cells, Bcl-2 negativity, slight T-cell infiltration (denser in the LZ), and no evidence of light  
173 chain restriction (Figure 1B-C). At contrast, the composition of the GEx displayed a CD20+ B  
174 cell phenotype, high Ki-67+ proliferative fraction, diffuse IRF4 positivity with IRF4+ cells co-  
175 expressing CD10, negativity for Bcl-2, and immunophenotypical restriction for lambda light  
176 chain (Figure 1B-C). Most of the cells populating the GEx also expressed CD138 (in the  
177 absence of CD30), indicating partial acquisition of a plasmablastic phenotype.  
178 Immunohistochemistry for HHV8 and *in situ* hybridization for EBER (EBV) proved negative  
179 (Supplementary Figure 1). On the basis of the GEx lambda light chain restriction, analysis of

180 the Ig light and heavy genes rearrangement was performed on DNA extracted by laser  
181 microdissection of the GEx, which revealed a polyclonal profile (Supplementary Figure 2).  
182 The strong and diffuse immunoreactivity of IRF4 and the co-occurrence of IRF4/CD10 double-  
183 expressing elements prompted the analysis of *IRF4* gene rearrangement by fluorescence in situ  
184 hybridization (FISH), which did not reveal any abnormality (Supplementary Figure 3),  
185 allowing to exclude an *IRF4*-rearranged lymphoma.

186

### 187 *Digital Spatial Profiling of the GEx regions reveals a distinctive profile*

188 We subsequently investigated the in situ transcriptional profile of the GC plasmablastic burst  
189 through the Nanostring GeoMx Digital Spatial Profiling technology. The expression of 1824  
190 genes from key cancer-associated transcriptional programs (Supplementary Table 1) was  
191 determined on 5 DZ, 5 LZ and 5 PERI ROIs selected from morphologically/phenotypically  
192 preserved follicles/perifollicular areas, and on 9 GEx ROIs. We then asked whether GEx ROIs  
193 could be defined by a specific gene signature; to this aim, principal component analysis (PCA)  
194 and unsupervised hierarchical clustering were investigated. PCA revealed that ROIs segregated  
195 according to their spatial classification, with PERI regions showing neatly separated profiles  
196 from GC ROIs including DZ, LZ and GEx, which clustered together with other GC regions,  
197 showing some degree of intermixing with LZ ROIs (Figure 2A). Consistently, clustering  
198 analysis confirmed the same degree of relationship between the different ROIs (Figure 2B).  
199 mRNA expression of the transcripts relative to the IHC markers evaluated for quantitative  
200 immunophenotypical analyses showed consistency with the protein expression pattern  
201 (Supplementary Figure 4). Pairwise differential expression analysis performed on the different  
202 ROIs allowed to identify candidate genes reflecting the distinctive profiles between the GEx  
203 ROIs in comparison with DZ LZ and PERI ROIs (Figure 2C-F). Among the 20 differentially  
204 expressed genes, 17 were significantly upregulated in GEx ROIs, while 3 were downmodulated

205 (Figure 2C-F). GEx hallmark genes included, along with the plasma cell differentiation  
206 markers *PRDM1*, *IRF4*, *TNFRSF17* (BCMA) and *CD9*, genes involved in 2-oxoglutarate  
207 metabolism (*GOT2*, *IDH2*), in IL17 pathway (*IL17RB*, *HSP90B1*) and cytokine signaling  
208 (*RASAL1*, *LTB*), in PI3K-Akt pathway (*SGK1*, *BCL2L1*), in lymphocyte activation (*ADA*,  
209 *SCL7A5*, *FCRL2*) and cell surface regulation of immune activation (*CD24*, *LILRB1*), in cell  
210 adhesion (*ANKRD28*) and response to abiotic (i.e. osmotic) stress (*SLKI*). Moreover, the long  
211 non-coding RNA *FAM30* was also listed among the GEx hallmarks.

212

213 *Spatial immune deconvolution of GEx ROIs shows enrichment in memory B cells and Plasma*  
214 *cells*

215 Based on the evidence of a distinct transcriptional profile of GEx regions in comparison with  
216 other GC and perifollicular regions, we investigated the immune composition of the ROIs  
217 according to transcriptional deconvolution. A SpatialDecon (10) approach using the safeTME  
218 matrix was adopted, which highlighted that GEx ROIs displayed a different microenvironment  
219 composition as compared with canonical LZ and DZ GC ROIs, also differing from peri-  
220 follicular ROIs (Figure 3, Supplementary Table 2), further indicating that a perturbation of the  
221 normal GC milieu. Specifically, GEx ROIs were positively enriched in Plasma cells and  
222 memory B cells as compared with other ROIs (Kruskal-Wallis p-values < 0.001), while being  
223 poorly infiltrated by T cells (Figure 2G).

224

225 *The GEx signature outlines DLBCL clusters with different enrichment in genetic subtypes and*  
226 *microenvironment composition*

227 The molecular profiles of non-malignant GC compartments can be exploited to probe GC  
228 microenvironment imprints in B-cell lymphomas with different degree of relationship with GC  
229 subpopulations, such as DLBCL, in which the COO has shown prognostic significance in the

230 setting of standard chemo-immunotherapy regimens (7). To investigate whether the  
231 transcriptional hallmarks identified in the GEx ROIs could be traced in the heterogeneous  
232 spectrum of B-cell malignant transformation recapitulated by DLBCL, we applied the GEx  
233 gene signature to a dataset of 481 DLBCL cases relative to Schmitz et al. (6). Based on the  
234 expression of the 20 genes of the GEx signature, DLBCL clustered into two main groups  
235 (Figure 3A), with the cluster 1 characterized by the overexpression of 17 genes  
236 (Supplementary Figure 5A) and by a trend towards a worse prognosis (Supplementary Figure  
237 5B-C). We subsequently investigated the distribution of the major DLBCL genetic subtypes  
238 according to Schmitz and Colleagues (6) and found that the relative frequency of the subtypes  
239 was significantly different in the two clusters identified by the GEx signature (Figure 3B-C,  
240 Supplementary Tables 3 and 4). Specifically, cluster 1, which was characterized by the general  
241 overexpression of hallmark genes of the GEx ROIs, showed a neat enrichment in cases with  
242 *MYD88* and *CD79B* mutation co-occurrence (MCD, Fisher p-value<10e-05), a higher  
243 frequency of cases with *BCL6* fusions and *NOTCH2* mutations (BN2, Fisher p-value=0,02),  
244 and a markedly lower frequency of cases with *EZH2* and *BCL2* lesions (EZB, Fisher p-  
245 value<10e-9) (Figure 3C, Supplementary Tables 4) suggesting that the genes positively  
246 characterizing GEx ROIs underlie a specific biology related with MCD genetics, known to be  
247 enriched in ABC clones undergoing plasmablastic/plasmacytic commitment (6).

248 Prompted by the finding of a different microenvironment composition of GEx ROIs in  
249 comparison with other GC and peri-follicular ROIs, we estimated the microenvironment of the  
250 DLBCL clusters identified according to GEx signature, through CIBERSORTx deconvolution.  
251 Consistently with the deconvolution of in situ transcriptional profiles of GEx ROIs, cluster 1,  
252 which was characterized by up-regulation of GEx hallmark genes, showed a significant  
253 enrichment in memory B cells and plasma cells (Mann-Whitney p-values < 0.001,  
254 Supplementary Table 5), and a decrease in CD8 T cells and follicular T helper cells (Figure

255 3D), indicating that a link between the GEx that is a GC-related lesion, and lymphomatous  
256 clones enriched in specific non-GC genetics, cell-of-origin and microenvironment, may exist.

257

## 258 **Discussion**

259 The transition of B cells undergoing selection and refinement of their IG receptor in the GC  
260 reaction towards effectors capable of Ig secretion implies the acquisition of  
261 plasmablastic/plasmacytoid features within the GC microenvironment. The spatial localization  
262 of these functional and phenotypical intermediates is still poorly characterized and depends on  
263 the dynamical modulation of chemotactic receptor/ligand axes interweaving with BCR-  
264 controlled programs (11). Proliferating cells with plasmablastic/plasmacytoid features  
265 accumulating within the GC therefore represents an element of atypia even in the setting of  
266 non-clonal events, and little is known about the *molecular signature* characterizing their  
267 transient state (12). In this report we phenotypically and transcriptionally characterized an  
268 immunoglobulin light chain restricted non-clonal atypical germinotropic expansion of  
269 plasmablastic cells, investigating differential features emerging from the comparison with  
270 neighboring GC and extra-GC regions. The GEx ROIs were characterized by the unique co-  
271 occurrence of IRF4 and CD10 expression, which highlighted a transitory state engendered by  
272 IRF4 control of GC exit (13) and CD10 ectopeptidase retention that can be observed in DLBCL  
273 with plasmablastic differentiation (14). On digital spatial profiling, a set of 20 genes were found  
274 differentially expressed in GEx ROIs as compared with neighboring DZ, LZ and PERI ROIs.  
275 The discriminating signature resulted positively enriched in the key transcription factors  
276 driving plasma cell differentiation IRF4 and PRDM1, and included the B-cell differentiation  
277 receptor BCMA involved in the transduction of trophic signals from APRIL and BAFF tumor  
278 necrosis factor superfamily ligands (15). Such molecular features supportive of a plasmablastic  
279 phenotype were also supported by the downregulation of CD24, a signal transducer negatively



280 modulated in response to BCR activation and along plasmablastic transition (16). The GC  
281 localization of the plasmablastic expansion found resonance in the overexpression of CD9. The  
282 tetraspanin CD9 has been reported to mark a subset of B cells in the human GC characterized  
283 by plasmablastic differentiation and Blimp1 (*PRDMI*) expression (17). These CD9+ GC B  
284 cells more efficiently give rise to CD20-CD38+ plasmablasts as compared with their CD9-  
285 counterpart. Moreover, in the murine setting, the efficient plasmablastic/plasmacytic  
286 differentiation of CD9+ B cells is shared by non-GC B-cells endowed with prompt commitment  
287 to Ig-secreting effectors, such as B1 B cells and marginal zone B-cells subsets (18). By  
288 applying the GEx differentially expressed genes signature to a well-characterized (both  
289 transcriptionally and genetically) DLBCL dataset, we aimed at investigating whether the  
290 atypical status of non-clonal germinotropic plasmablastic expansion could be represented in  
291 the transcriptional signature of a subset of DLBCL of either ABC or GCB COO. Previous  
292 reports described a subset of ABC-DLBCL expressing *PRDMI*/BLIMP1 and demonstrated  
293 that loss of function of this antigen is harbinger of a poor prognosis (19). Expression of  
294 IRF4/MUM1 is routinely employed in the diagnostic setting for the distinction of non-GC  
295 subtypes based on immunohistochemical algorithms (20). Moreover, specific subtypes of large  
296 B-cell lymphomas characterized by IRF4 rearrangement have been recently described and  
297 recognized as independent entities in the most recent WHO classification (21). We report  
298 additional molecular markers potentially associated with plasmablastic commitment in the GC,  
299 including the receptor of IL17B/IL25 IL17RB, the overexpression of which marks  
300 lymphoplasmacytic lymphomas with mutant *MYD88*<sup>L265P</sup> and *CXCR4*<sup>WT</sup> (22). In the GC  
301 setting, IL17B/IL25 signaling could enforce NF-κB activity (23) through TRAF6, which  
302 cooperation with CD40 signaling is required for B-cell affinity maturation and plasma cell  
303 differentiation (24). From the genes positively and negatively characterizing GEx ROIs, no  
304 relevant clues emerge about the mechanisms leading to the atypical GC retention and expansion



305 of the plasmablastic elements. Under normal conditions, the suppression of Bach2 and Pax5  
306 transcripts, along with the down-regulation of Bcl-6, IRF8 and PU-1 and the activation of  
307 BLIMP1 and MUM1/IRF4, drive the development of PCs resulting from the GC reaction (1).  
308 Once their effector/memory fate is established, B cells escape from the GCs through the  
309 suppression of the BCL-6-induced “confinement factor” S1PR2 and the expression of pro-  
310 migratory receptors that are likely to be involved in GC exit, such as EBI2 and S1PR1 (25).  
311 The downmodulation of lymphotoxin beta transcript emerging from the GEx ROIs profiling  
312 can imply an impaired activation of the FDC meshwork by resident elements (26) which would  
313 in turn impact on the maintenance of a functional GC microenvironment licensing atypical  
314 plasmablastic expansion within the GC contexture. Indeed, some cases of abrupt/florid  
315 follicular hyperplasia have been described in which activated B cells are mainly localized in  
316 the GCs, partly twisting the normal follicular architecture and even showing  
317 immunohistochemical light chain (oligoclonal) restriction, leading to diagnostic concern for  
318 neoplasia (27). The perturbation of normal GC dynamics in GEx was also indicated by an  
319 overall depletion in the Th compartment on transcriptional deconvolution analysis, which was  
320 similar to that of the DZ, conflicting with the memory B and plasma cell enrichment. In  
321 DLBCL, GEx hallmark genes identified a subgroup with positive enrichment in MCD genetics  
322 and ABC COO, indicating that GC-related proliferations of plasmablastic elements may be  
323 transcriptionally linked with non-GC DLBCL. These cases characterized by a dyscrasia  
324 between cyto-architectural, phenotypical and topographic profile of a B-cell expansion with  
325 plasmablastic/plasmacytic features may help in finding a link with the pathogenesis specific  
326 DLBCL subsets (28) and reconcile an ABC-COO with GC-related lesions (29).

327

328 **Acknowledgements**

329 The Authors wish to acknowledge Prof. Maurilio Ponzoni for helpful discussion. This study  
330 has been supported by the Italian Foundation for Cancer Research (AIRC) through the IG-2018  
331 22145 Investigator Grant to C.T.; 5x1000 22759 Grant to C.T.; and by the Italian Ministry of  
332 Education, University and Research (MIUR) grant 2017K7FSYB to C.T.

333

334

335

## 336 REFERENCES

- 337  
338  
339  
340  
341  
342  
343  
344  
345  
346  
347  
348  
349  
350  
351  
352  
353  
354  
355  
356  
357  
358  
359  
360  
361  
362  
363  
364  
365  
366  
367  
368  
369  
370  
371  
372  
373  
374  
375  
376  
377  
378  
379  
380  
381  
382
1. De Silva NS, Klein U. Dynamics of B cells in germinal centres. *Nat Rev Immunol.* 2015 Mar;15(3):137-48. doi: 10.1038/nri3804. Epub 2015 Feb 6. PMID: 25656706; PMCID: PMC4399774.
  2. Allen CD, Okada T, Cyster JG. Germinal-center organization and cellular dynamics. *Immunity.* 2007 Aug;27(2):190-202. doi: 10.1016/j.immuni.2007.07.009. PMID: 17723214; PMCID: PMC2242846.
  3. Yam-Puc JC, Zhang L, Maqueda-Alfaro RA, Garcia-Ibanez L, Zhang Y, Davies J et al. Enhanced BCR signaling inflicts early plasmablast and germinal center B cell death. *iScience.* 2021 Jan 7;24(2):102038. doi: 10.1016/j.isci.2021.102038. PMID: 33532715; PMCID: PMC7822941.
  4. Alizadeh AA, Eisen MB, Davis RE, Ma C, Lossos IS, Rosenwald A et al. Distinct types of diffuse large B-cell lymphoma identified by gene expression profiling. *Nature.* 2000 Feb 3;403(6769):503-11. doi: 10.1038/35000501. PMID: 10676951.
  5. Chapuy B, Stewart C, Dunford AJ, Kim J, Kamburov A, Redd RA et al. Molecular subtypes of diffuse large B cell lymphoma are associated with distinct pathogenic mechanisms and outcomes. *Nat Med.* 2018 May;24(5):679-690. doi: 10.1038/s41591-018-0016-8. Epub 2018 Apr 30. Erratum in: *Nat Med.* 2018 Aug;24(8):1292. Erratum in: *Nat Med.* 2018 Aug;24(8):1290-1291. PMID: 29713087; PMCID: PMC6613387.
  6. Schmitz R, Wright GW, Huang DW, Johnson CA, Phelan JD, Wang JQ et al. Genetics and Pathogenesis of Diffuse Large B-Cell Lymphoma. *N Engl J Med.* 2018 Apr 12;378(15):1396-1407. doi: 10.1056/NEJMoa1801445. PMID: 29641966; PMCID: PMC6010183.
  7. Tripodo C, Zanardi F, Iannelli F, Mazzara S, Vegliante M, Morello G et al. A Spatially Resolved Dark- versus Light-Zone Microenvironment Signature Subdivides Germinal Center-Related Aggressive B Cell Lymphomas. *iScience.* 2020 Sep 16;23(10):101562. doi: 10.1016/j.isci.2020.101562. PMID: 33083730; PMCID: PMC7522121.
  8. Ritchie ME, Phipson B, Wu D, Hu Y, Law CW, Shi W et al. Limma powers differential expression analyses for RNA-sequencing and microarray studies. *Nucleic Acids Res.* 2015 Apr 20;43(7):e47. doi: 10.1093/nar/gkv007. Epub 2015 Jan 20. PMID: 25605792; PMCID: PMC4402510.
  9. Rusk, N. Expanded CIBERSORTx. *Nat Methods* **16**, 577 (2019). <https://doi.org/10.1038/s41592-019-0486-8>
  10. Danaher, Kim et al., Advances in mixed cell deconvolution enable quantification of cell types in spatially-resolved gene expression data, *BioRxiv*, 2020, doi: <https://doi.org/10.1101/2020.08.04.235168>

- 383 11. Varano G, Raffel S, Sormani M, Zanardi F, Lonardi S, Zasada C et al. The B-cell  
384 receptor controls fitness of MYC-driven lymphoma cells via GSK3 $\beta$  inhibition. *Nature*.  
385 2017 Jun 8;546(7657):302-306. doi: 10.1038/nature22353. Epub 2017 May 31. PMID:  
386 28562582.  
387
- 388 12. Tarte K, Zhan F, De Vos J, Klein B, Shaughnessy J Jr. Gene expression profiling of  
389 plasma cells and plasmablasts: toward a better understanding of the late stages of B-  
390 cell differentiation. *Blood*. 2003 Jul 15;102(2):592-600. doi: 10.1182/blood-2002-10-  
391 3161. Epub 2003 Mar 27. PMID: 12663452.  
392
- 393 13. De Silva NS, Simonetti G, Heise N, Klein U. The diverse roles of IRF4 in late germinal  
394 center B-cell differentiation. *Immunol Rev*. 2012 May;247(1):73-92. doi:  
395 10.1111/j.1600-065X.2012.01113.x. PMID: 22500833.  
396
- 397 14. Sonja Boy, Marlene van Heerden, Roger Pool, Pascale Willem & Tomas Slavik.  
398 Plasmablastic lymphoma versus diffuse large B cell lymphoma with plasmablastic  
399 differentiation: proposal for a novel diagnostic scoring system. *Journal of*  
400 *Hematopathology* volume 8, pages 3–11 (2015). DOI 10.1007/s12308-014-0227-y.  
401
- 402 15. O'Connor BP, Raman VS, Erickson LD, Cook WJ, Weaver LK, Ahonen C et al. BCMA  
403 is essential for the survival of long-lived bone marrow plasma cells. *J Exp Med*. 2004  
404 Jan 5;199(1):91-8. doi: 10.1084/jem.20031330. PMID: 14707116; PMCID:  
405 PMC1887725.  
406
- 407 16. Jourdan M, Caraux A, Caron G, Robert N, Fiol G, Rème T et al. Characterization of a  
408 transitional preplasmablast population in the process of human B cell to plasma cell  
409 differentiation. *J Immunol*. 2011 Oct 15;187(8):3931-41. doi:  
410 10.4049/jimmunol.1101230. Epub 2011 Sep 14. PMID: 21918187.  
411
- 412 17. Yoon SO, Zhang X, Lee IY, Spencer N, Vo P, Choi YS. CD9 is a novel marker for  
413 plasma cell precursors in human germinal centers. *Biochem Biophys Res Commun*.  
414 2013 Feb 1;431(1):41-6. doi: 10.1016/j.bbrc.2012.12.102. Epub 2013 Jan 3. PMID:  
415 23291167; PMCID: PMC3563937.  
416
- 417 18. Won WJ, Kearney JF. CD9 is a unique marker for marginal zone B cells, B1 cells, and  
418 plasma cells in mice. *J Immunol*. 2002 Jun 1;168(11):5605-11. doi:  
419 10.4049/jimmunol.168.11.5605. PMID: 12023357.  
420
- 421 19. Xia Y, Xu-Monette ZY, Tzankov A, Li X, Manyam GC, Murty V et al. Loss of  
422 PRDM1/BLIMP-1 function contributes to poor prognosis of activated B-cell-like  
423 diffuse large B-cell lymphoma. *Leukemia*. 2017 Mar;31(3):625-636. doi:  
424 10.1038/leu.2016.243. Epub 2016 Aug 29. PMID: 27568520; PMCID: PMC5837859.  
425
- 426 20. Hans CP, Weisenburger DD, Greiner TC, Gascoyne RD, Delabie J, Ott G et al.  
427 Confirmation of the molecular classification of diffuse large B-cell lymphoma by  
428 immunohistochemistry using a tissue microarray. *Blood*. 2004 Jan 1;103(1):275-82.  
429 doi: 10.1182/blood-2003-05-1545. Epub 2003 Sep 22. PMID: 14504078.  
430

- 431 21. Swerdlow, S.H.; Campo, E.; Harris, N.L.; Jaffe, E.S.; Pileri, S.A.; Stein, H. et al. WHO  
432 Classification of Tumours of Haematopoietic and Lymphoid Tissues, Revised 4th ed.;  
433 IARC: Lyon, France, 2017.  
434
- 435 22. Hunter ZR, Xu L, Yang G, Tsakmaklis N, Vos JM, Liu X et al. Transcriptome  
436 sequencing reveals a profile that corresponds to genomic variants in Waldenström  
437 macroglobulinemia. *Blood*. 2016 Aug 11;128(6):827-38. doi: 10.1182/blood-2016-03-  
438 708263. Epub 2016 Jun 14. PMID: 27301862; PMCID: PMC4982454.  
439
- 440 23. Maezawa Y, Nakajima H, Suzuki K, Tamachi T, Ikeda K, Inoue J et al. Involvement of  
441 TNF receptor-associated factor 6 in IL-25 receptor signaling. *J Immunol*. 2006 Jan  
442 15;176(2):1013-8. doi: 10.4049/jimmunol.176.2.1013. PMID: 16393988.  
443
- 444 24. Ahonen C, Manning E, Erickson LD, O'Connor B, Lind EF, Pullen SS et al. The CD40-  
445 TRAF6 axis controls affinity maturation and the generation of long-lived plasma cells.  
446 *Nat Immunol*. 2002 May;3(5):451-6. doi: 10.1038/ni792. Epub 2002 Apr 22. PMID:  
447 11967542; PMCID: PMC2834483.  
448
- 449 25. Green JA, Cyster JG. S1PR2 links germinal center confinement and growth regulation.  
450 *Immunol Rev*. 2012 May;247(1):36-51. doi: 10.1111/j.1600-065X.2012.01114.x.  
451 PMID: 22500830; PMCID: PMC3335345.  
452
- 453 26. Myers RC, King RG, Carter RH, Justement LB. Lymphotoxin  $\alpha\beta 2$  expression on B  
454 cells is required for follicular dendritic cell activation during the germinal center  
455 response. *Eur J Immunol*. 2013 Feb;43(2):348-59. doi: 10.1002/eji.201242471. Epub  
456 2012 Dec 5. PMID: 23112125; PMCID: PMC3753018.  
457
- 458 27. Gars E, Butzmann A, Ohgami R, Balakrishna JP, O'Malley DP. The life and death of  
459 the germinal center. *Ann Diagn Pathol*. 2020 Feb;44:151421. doi:  
460 10.1016/j.anndiagpath.2019.151421. Epub 2019 Nov 13. PMID: 31751845.  
461
- 462 28. Wright GW, Huang DW, Phelan JD, Coulibaly ZA, Roulland S, Young RM et al. A  
463 Probabilistic Classification Tool for Genetic Subtypes of Diffuse Large B Cell  
464 Lymphoma with Therapeutic Implications. *Cancer Cell*. 2020 Apr 13;37(4):551-  
465 568.e14. doi: 10.1016/j.ccell.2020.03.015. PMID: 32289277.  
466
- 467 29. Kotlov N, Bagaev A, Revuelta MV, Phillip JM, Cacciapuoti MT, Antysheva Z et al.  
468 Clinical and Biological Subtypes of B-cell Lymphoma Revealed by  
469 Microenvironmental Signatures. *Cancer Discov*. 2021 Jun;11(6):1468-1489. doi:  
470 10.1158/2159-8290.CD-20-0839. Epub 2021 Feb 4. PMID: 33541860; PMCID:  
471 PMC8178179.  
472  
473  
474  
475

## 476 **FIGURE LEGENDS**

### 477 **Figure 1**

478 **A**, Digitalized slide selection of the Haematoxylin and Eosin (H&E)-stained section of the  
479 tonsil highlighting the presence of an aberrantly expanded germinal center (asterisk)  
480 characterized by the presence of elements with plasmacytoid morphology (inset). On the H&E,  
481 representative regions relative to germinal center dark zone (DZ) and light zone (LZ) areas,  
482 peri-follicular (Peri) areas, and germinotropic plasmablastic expansion (GEx) areas, are  
483 highlighted. Original magnification x50. **B**, Comparative analysis of H&E and IHC for Bcl-2,  
484 Bcl-6, CD3, CD20, Kappa and Lambda light chain, Ki67, IRF4, IRF4/CD10, CD2, CD138 in  
485 the DZ, LZ, Peri and GEx areas highlighted in A. **C**, Heatmap of the average expression of the  
486 quantitative immunohistochemical analysis of the markers evaluated in the DZ, LZ, Peri, and  
487 GEx areas highlighted in B.

488

### 489 **Figure 2**

490 **A**, Two-dimensional principal component reduction of the DZ (n=5), LZ (n=5), Peri (n=5), and  
491 GEx (n=9) regions of interest (ROIs) profiles according to Digital Spatial Profiling of 1824  
492 genes. **B**, Unsupervised hierarchical clustering of the 24 ROIs. **C**, Venn diagram of UP-  
493 modulated genes from three different comparisons (i.e., GEx vs DZ, GEx vs LZ, and GEx vs  
494 Peri). **D**, Venn diagram of DOWN modulated genes from three different comparisons (i.e.,  
495 GEx vs DZ, GEx vs LZ, and GEx vs Peri). **E**, GEx signature genes. These genes are  
496 significantly differentially expressed in GEx in each comparison. **F**, Heatmap of differentially  
497 expressed genes in GEx as compared to DZ, LZ and Peri ROIs. The GEx signature shows a  
498 high discriminatory capacity between GEx ROIs and the other regions. **G**, Average  
499 SpatialDecon fractions of cell types in the four ROI subgroups. Kruskal-Wallis test has been  
500 applied to compare fraction distributions among groups (Supplementary table 2).

501

### 502 **Figure 3**

503 **A**, Unsupervised clustering analysis of the 481 DLBCL cases based on the GEx signature. It  
504 identifies two distinct clusters; the blue one is characterized by a higher gene expression, while  
505 a lower gene expression characterizes the green one. **B**, Barplot of cell of origin (COO) absolute  
506 frequencies observed among clusters. Cluster 1 is enriched by ABC cases, whereas cluster 2 is  
507 enriched by GCB cases (Fisher p-values < 10e-15). **C**, Barplot of genetic subtypes absolute  
508 frequencies observed among clusters (Fisher p-values reported in Supplementary Table 3). **D**,  
509 Average CIBERSORTx fractions of cell types in the four ROI subgroups. Wilcoxon-Mann-  
510 Withney test has been applied to compare fraction distributions among groups (Supplementary  
511 Table 4).

512



**Figure 1**

**A**

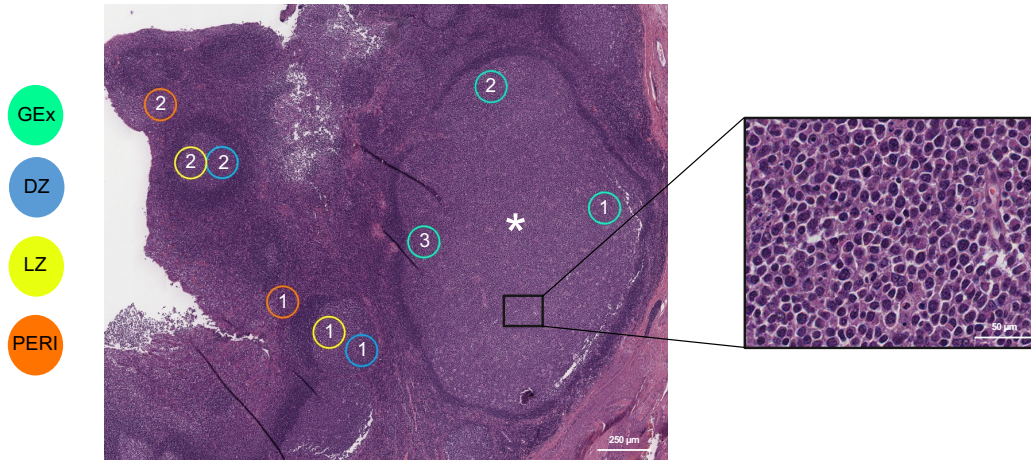

**B**

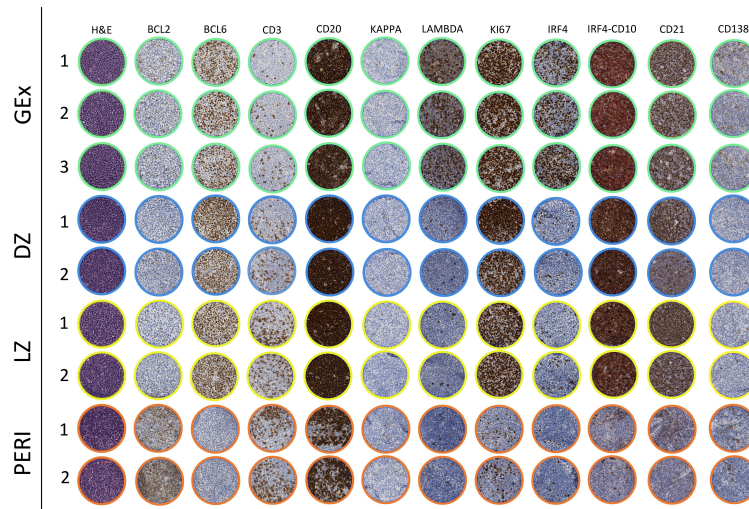

**C**

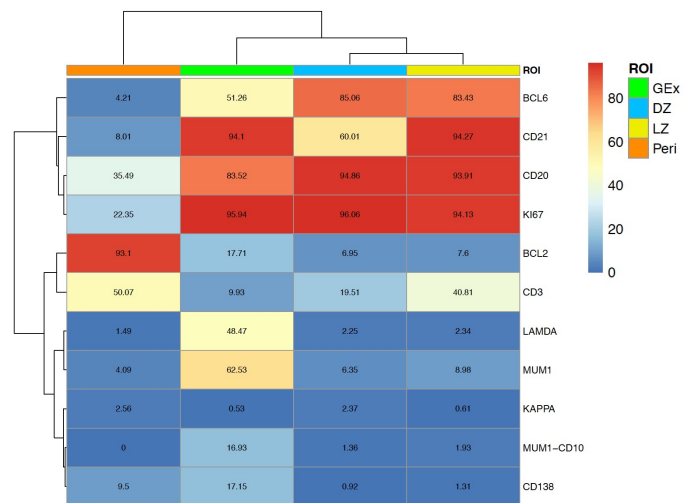

**Figure 2**

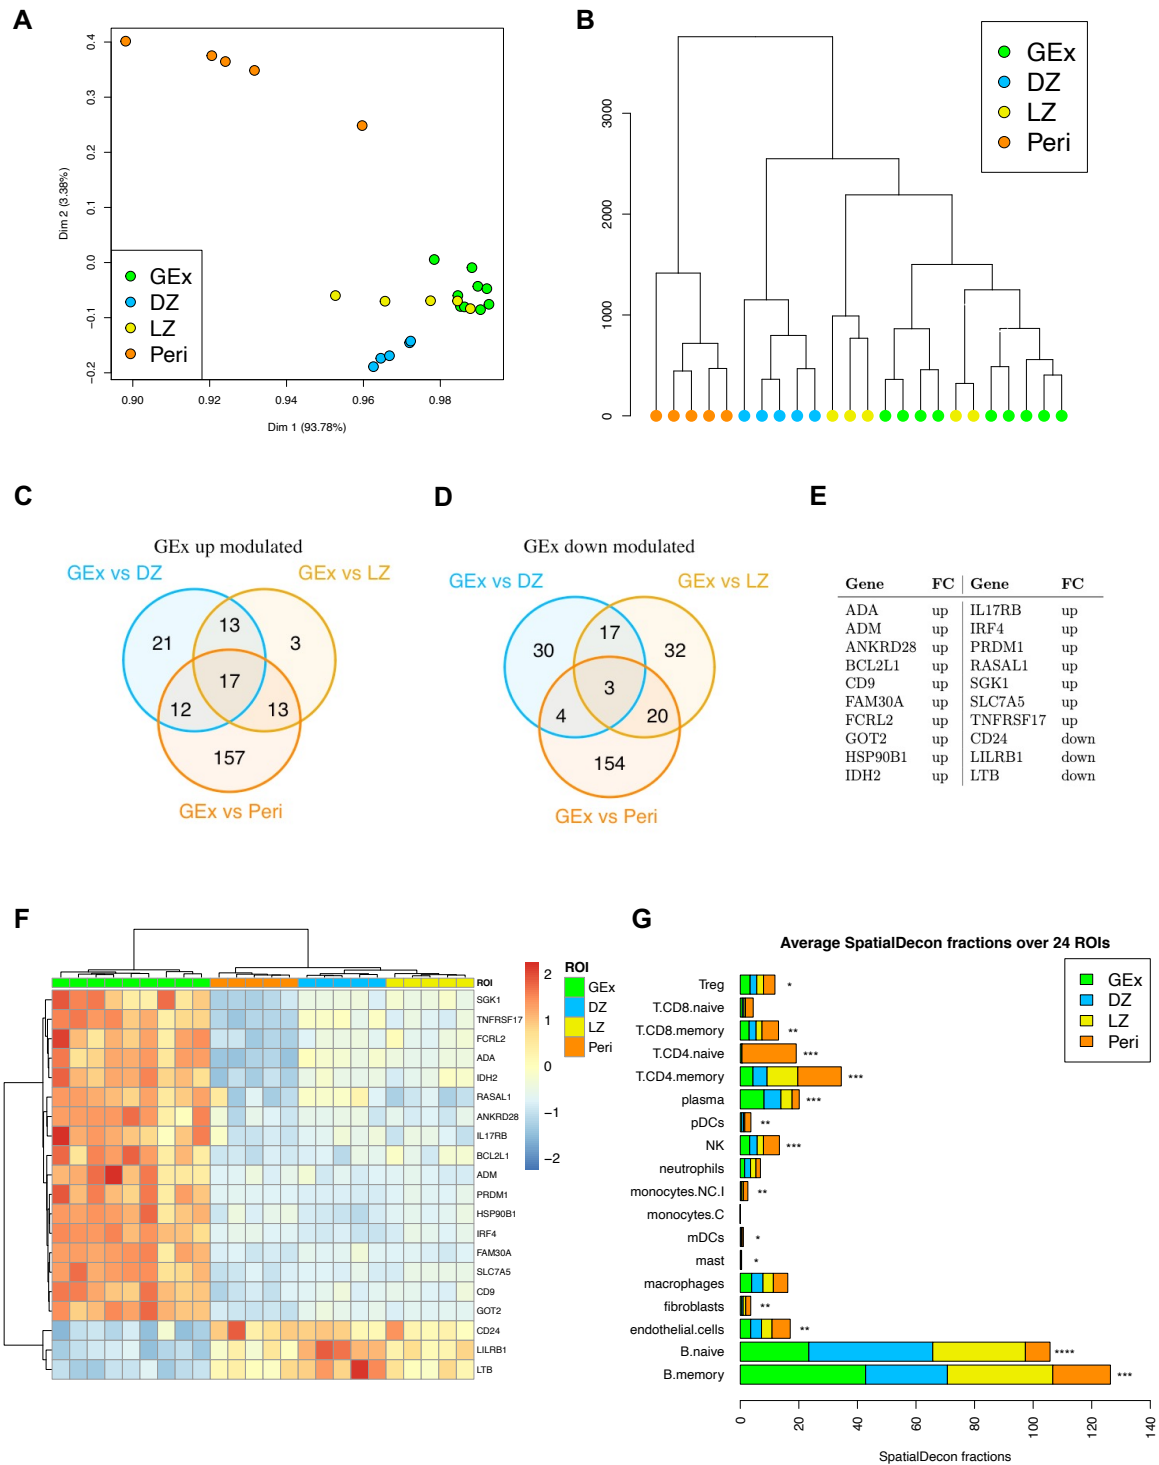

514



**Figure 3**

**A**

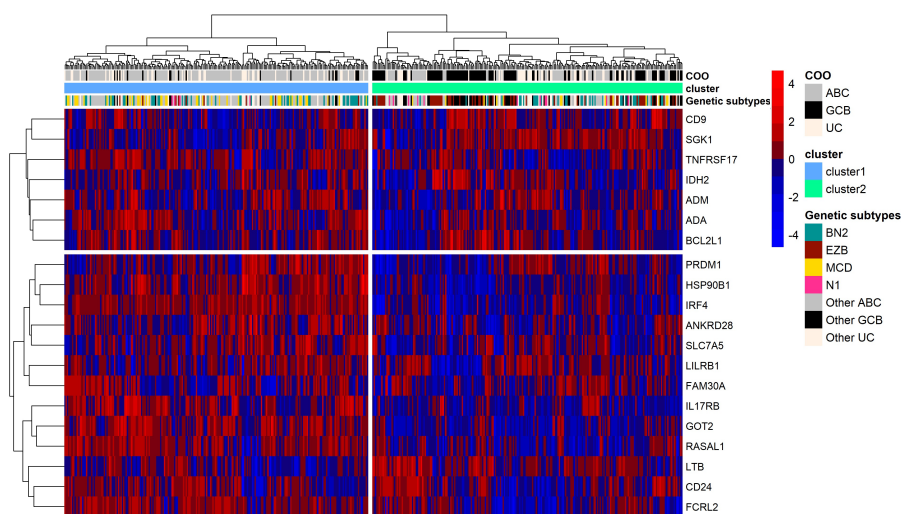

**B**

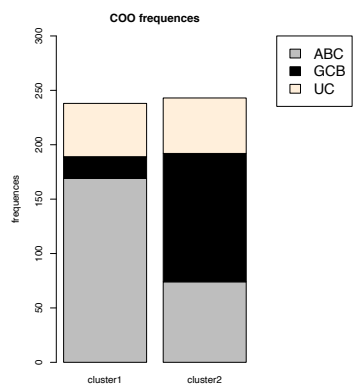

**C**

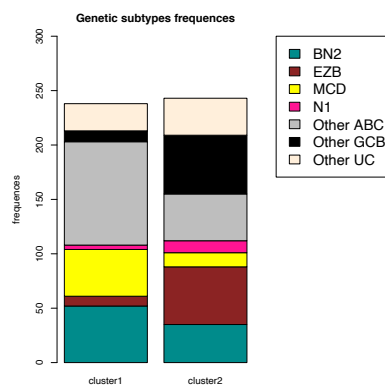

**D**

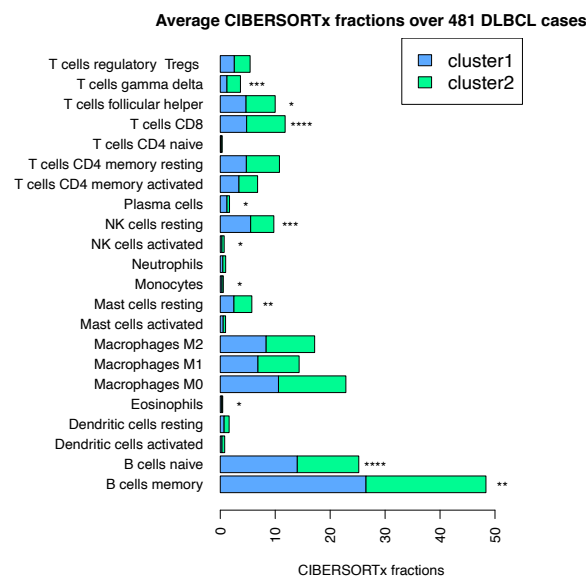

Source: https://medrxiv.org/content/10.1101/2021.07.28.21261117v2.full.pdf
